# Supplementary material
Source: Springer Nature journal article supplement (https://www.springermedizin.de/resource/supplementary/13063_2012_1098_MOESM3_ESM.pdf/9619700)

 = Division boundary

 = Division level intervention components implemented

 = Intervention communities (intensive intervention)

 = Control communities (only Division level intervention)

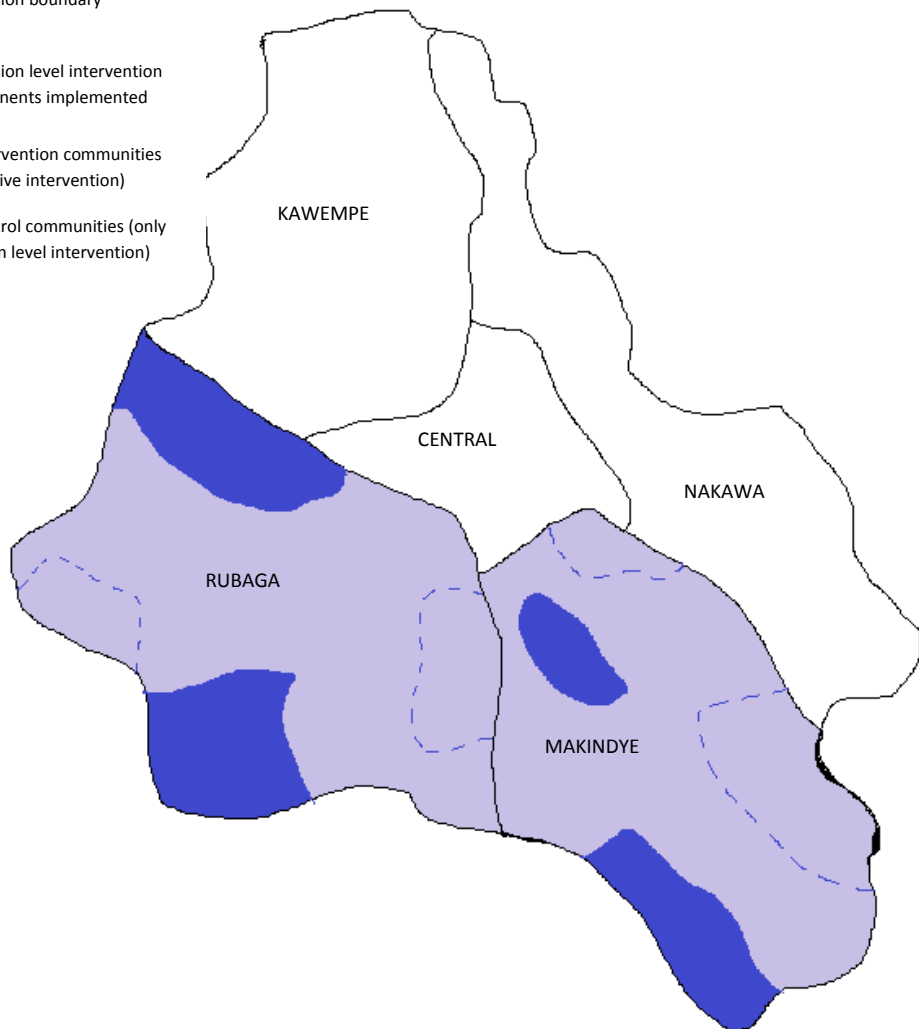

Supplement: MOESM3 [file 9619700]
